# Supplementary material for: Peat substrate amended with chitin modulates the N-cycle, siderophore and chitinase responses in the lettuce rhizobiome
Source: PubMed Central journal article supplement (PMC6617458; doi:10.1038/s41598-019-46106-x), 2019-07-09
Supplement: 41598_2019_46106_MOESM1_ESM.pdf [file 41598_2019_46106_MOESM1_ESM.pdf]

## Supplementary material:

### Peat substrate amended with chitin modulates the N-cycle, siderophore and chitinase in the lettuce rhizosphere microbiome

De Tender C<sup>1,2,\*</sup>, Mesuere B<sup>2,3</sup>, Vanderjeugt F<sup>2</sup>, Haegeman A<sup>1</sup>, Ruttink T<sup>1</sup>, Vandecasteele B<sup>1</sup>, Dawyndt P<sup>2</sup>, Debode J<sup>1</sup>, Kuramae E E<sup>4</sup>

**Table S1: Total concentrations of nutrients in pure chitin before addition to the growing medium.**

|               |        |
|---------------|--------|
| Cd (mg/kg DM) | 0.1    |
| Cr (mg/kg DM) | 6.1    |
| Cu (mg/kg DM) | 1.0    |
| Pb (mg/kg DM) | 0.3    |
| Ni (mg/kg DM) | 2.9    |
| Zn (mg/kg DM) | 1.8    |
| Mn (mg/kg DM) | 2.0    |
| P (mg/kg DM)  | 528.0  |
| K (mg/kg DM)  | 56.7   |
| Mg (mg/kg DM) | 199.8  |
| Ca (mg/kg DM) | 2019.0 |
| Na (mg/kg DM) | 1077.2 |
| Fe (mg/kg DM) | 143.0  |
| Al (mg/kg DM) | 34.5   |
| N (%/ADS)     | 7.1    |

**Table S2. Number of sequencing reads per sample.** The original number of reads (raw data), the number of reads retained after quality control (QC) and the number of reads aligned to a taxonomical identity (Taxonomy) by MG-RAST and Unipept pipelines. PS = peat substrate; Chitin = peat amended with chitin

| Sample  | Original number of reads | MG-RAST    |          | UMGAP      |           |
|---------|--------------------------|------------|----------|------------|-----------|
|         |                          | QC         | Taxonomy | QC         | Taxonomy  |
| PS2     | 10,500,768               | 8,690,797  | 23,138   | 9,104,062  | 1,183,348 |
| PS3     | 19,721,339               | 15,703,981 | 38,888   | 16,946,110 | 2,562,961 |
| PS4     | 10,454,657               | 8,524,676  | 22,423   | 9,060,597  | 1,341,623 |
| PS5     | 23,458,499               | 8,400,028  | 19,536   | 20,474,220 | 2,931,258 |
| Chitin1 | 10,221,155               | 8,312,158  | 20,885   | 8,884,083  | 1,339,812 |
| Chitin3 | 10,331,359               | 8,461,027  | 25,499   | 8,879,723  | 1,253,102 |
| Chitin5 | 11,531,506               | 9,121,736  | 34,810   | 9,448,011  | 1,566,486 |
| Chitin6 | 16,546,062               | 13,609,531 | 56,491   | 13,900,194 | 1,962,736 |

**Table S3. Number and percentage of the reads per sample classified as function by MG-RAST. PS = peat substrate; Chitin = peat amended with chitin.**

| <b>Sample</b>  | <b>QC-filtered reads</b> | <b>Function-related sequences</b> | <b>%</b> |
|----------------|--------------------------|-----------------------------------|----------|
| <b>PS2</b>     | 8,690,797                | 3,566,657                         | 41.04    |
| <b>PS3</b>     | 15,703,981               | 7,068,650                         | 45.01    |
| <b>PS4</b>     | 8,524,676                | 3,243,322                         | 41.83    |
| <b>PS5</b>     | 8,400,028                | 3,658,359                         | 43.55    |
| <b>Chitin1</b> | 8,312,158                | 3,715,013                         | 44.69    |
| <b>Chitin3</b> | 8,461,027                | 3,448,172                         | 40.75    |
| <b>Chitin5</b> | 9,121,736                | 3,559,690                         | 39.02    |
| <b>Chitin6</b> | 13,609,531               | 5,362,006                         | 39.40    |

**Table S4. Trimmed mean of M-values (TMM) normalized average counts ( $\pm$ standard error, n=4) of functional categories between peat substrate (PS) and chitin amended peat substrate (Chitin) samples. Functional categories of the SEED database level 1 are shown.**

| Function                                           | PS                              | Chitin                          | P-value          |
|----------------------------------------------------|---------------------------------|---------------------------------|------------------|
| Amino acids and derivatives                        | 9.73 $\pm$ 0.02                 | 9.73 $\pm$ 0.09                 | 0.959            |
| Carbohydrates                                      | 13.20 $\pm$ 0.13                | 13.02 $\pm$ 0.04                | 0.140            |
| Cell division and cell cycle                       | 0.94 $\pm$ 0.01                 | 0.95 $\pm$ 0.02                 | 0.688            |
| Cell wall and capsule                              | 4.11 $\pm$ 0.03                 | 4.09 $\pm$ 0.01                 | 0.428            |
| Clustering-based subsystems                        | 12.49 $\pm$ 0.04                | 12.46 $\pm$ 0.07                | 0.999            |
| Cofactors, vitamins, prosthetic groups, pigments   | 5.33 $\pm$ 0.03                 | 5.31 $\pm$ 0.04                 | 0.564            |
| DNA metabolism                                     | 4.56 $\pm$ 0.02                 | 4.59 $\pm$ 0.02                 | 0.469            |
| Dormancy and sporulation                           | 0.11 $\pm$ 0.01                 | 0.11 $\pm$ 0.01                 | 0.494            |
| Fatty acids, lipids and isoprenoids                | 2.75 $\pm$ 0.05                 | 2.76 $\pm$ 0.03                 | 0.707            |
| <b>Iron acquisition and metabolism</b>             | <b>0.93<math>\pm</math>0.02</b> | <b>1.03<math>\pm</math>0.04</b> | <b>&lt;0.001</b> |
| Membrane transport                                 | 4.06 $\pm$ 0.05                 | 4.08 $\pm$ 0.03                 | 0.633            |
| Metabolism of aromatic compounds                   | 1.79 $\pm$ 0.09                 | 1.83 $\pm$ 0.06                 | 0.516            |
| Miscellaneous                                      | 6.31 $\pm$ 0.03                 | 6.35 $\pm$ 0.03                 | 0.420            |
| Motility and chemotaxis                            | 1.37 $\pm$ 0.01                 | 1.35 $\pm$ 0.02                 | 0.268            |
| <b>Nitrogen metabolism</b>                         | <b>1.37<math>\pm</math>0.02</b> | <b>1.29<math>\pm</math>0.03</b> | <b>0.002</b>     |
| Nucleosides and nucleotides                        | 3.09 $\pm$ 0.04                 | 3.08 $\pm$ 0.01                 | 0.444            |
| Phages, prophages, transposable elements, plasmids | 1.16 $\pm$ 0.03                 | 1.23 $\pm$ 0.06                 | 0.057            |
| Phosphorus metabolism                              | 1.27 $\pm$ 0.03                 | 1.29 $\pm$ 0.02                 | 0.391            |
| Photosynthesis                                     | 0.07 $\pm$ <0.01                | 0.08 $\pm$ 0.01                 | 0.054            |
| Potassium metabolism                               | 0.88 $\pm$ 0.02                 | 0.88 $\pm$ 0.02                 | 0.918            |
| Protein metabolism                                 | 7.83 $\pm$ 0.01                 | 7.80 $\pm$ 0.02                 | 0.622            |
| Regulation and signaling                           | 1.09 $\pm$ 0.02                 | 1.11 $\pm$ 0.01                 | 0.053            |
| Respiration                                        | 4.35 $\pm$ 0.02                 | 4.26 $\pm$ 0.04                 | 0.057            |
| RNA metabolism                                     | 3.68 $\pm$ 0.01                 | 3.73 $\pm$ 0.04                 | 0.151            |
| Secondary metabolism                               | 0.26 $\pm$ <0.01                | 0.25 $\pm$ 0.01                 | 0.311            |
| Stress response                                    | 2.71 $\pm$ 0.01                 | 2.75 $\pm$ 0.01                 | 0.242            |
| Sulfur metabolism                                  | 1.05 $\pm$ 0.01                 | 1.06 $\pm$ 0.01                 | 0.657            |
| Virulence, disease and defense                     | 3.43 $\pm$ 0.07                 | 3.45 $\pm$ 0.11                 | 0.764            |

*Bold = Significant differences.*

**Table S5. TMM normalized counts of functional categories significantly different in the rhizosphere due to chitin addition in peat substrate.**

| Level 1                                          | Level 3                                                                      | PS       | Chitin   |
|--------------------------------------------------|------------------------------------------------------------------------------|----------|----------|
| Amino Acids and Derivatives                      | Branched chain amino acid degradation regulons                               | 3523±112 | 3789±17  |
|                                                  | Branched chain amino acid biosynthesis                                       | 6497±66  | 6147±87  |
|                                                  | Valine degradation                                                           | 1528±8   | 1632±30  |
|                                                  | Histidine degradation                                                        | 895±21   | 108±61   |
|                                                  | Methionine degradation                                                       | 1524±17  | 1400±34  |
| Carbohydrates                                    | Threonine and homoserine biosynthesis                                        | 2523±12  | 2393±18  |
|                                                  | Proline, 4-hydroxyproline uptake and utilization                             | 1580±27  | 1731±56  |
|                                                  | (GlcNAc) <sub>2</sub> catabolic operon                                       | 146±12   | 205±16   |
|                                                  | Chitin and N-acetylglucosamine utilization                                   | 1770±64  | 2147±65  |
|                                                  | Pentose phosphate pathway                                                    | 3865±63  | 3554±74  |
|                                                  | Pyruvate:ferredoxin oxidoreductase                                           | 230±16   | 148±22   |
|                                                  | Lactose and galactose uptake and utilization                                 | 1685±39  | 1524±71  |
|                                                  | Lactose utilization                                                          | 798±25   | 692±41   |
|                                                  | Fermentations: lactate                                                       | 1813±30  | 1386±52  |
|                                                  | L-ascorbate utilization                                                      | 45±1     | 30±4     |
|                                                  | Lacto-N-biose I and Galacto-N biose metabolic pathway                        | 593±5    | 524±23   |
|                                                  | Propionyl-CoA to succinyl CoA module                                         | 2225±16  | 1204±28  |
|                                                  | Cellulosome                                                                  | 379±19   | 436±15   |
|                                                  | Ethanolamine utilization                                                     | 630±33   | 481±14   |
|                                                  | Glycerol and glycerol-3-phosphate uptake and utilization                     | 1961±33  | 2094±45  |
| Mannitol utilization                             | 372±7                                                                        | 445±26   |          |
| Cell wall and capsule                            | Lipid A-Ara4N pathway                                                        | 2106±92  | 1886±66  |
|                                                  | LOS core oligosaccharide biosynthesis                                        | 1337±16  | 1199±32  |
|                                                  | tRNA-dependent amino acid transfers                                          | 7±2      | 13±1     |
| Clustering-based subsystem                       |                                                                              | 3150±29  | 2981±54  |
|                                                  | CBSS-258594.1.peg.3339                                                       |          |          |
|                                                  | CBSS-314269.3.peg.1840                                                       | 1107±20  | 931±48   |
|                                                  | CBSS-393131.3.peg.612                                                        | 2417±87  | 2615±101 |
|                                                  | Glycogen metabolism cluster                                                  | 1955±80  | 1774±51  |
| CBSS-316057.3.peg.1308                           | 219±14                                                                       | 277±23   |          |
| Cofactors, vitamins, prosthetic groups, pigments |                                                                              | 3795±42  | 3539±56  |
|                                                  | Molybdenum_cofactor_biosynthesis                                             |          |          |
| DNA metabolism                                   | Heme_biosynthesis_orphans                                                    | 100±10   | 59±4     |
|                                                  | DNA_phosphorothioation                                                       | 66±6     | 48±6     |
| Dormancy and sporulation                         | Restriction-Modification_System                                              | 1771±30  | 1623±82  |
|                                                  | Type_I_Restriction-Modification                                              | 1807±26  | 1628±108 |
|                                                  |                                                                              | 10±3     | 25±5     |
|                                                  | Spore_pigment_biosynthetic_cluster_in_Actinomycetes                          |          |          |
|                                                  |                                                                              | 28±3     | 45±10    |
|                                                  | Fatty_Acid_Biosynthesis_FASI                                                 |          |          |
|                                                  |                                                                              | 764±18   | 876±30   |
| Fatty acids, lipids and isoprenoids              | Heme,_hemin_uptake_and_utilization_systems_in_GramNegatives                  |          |          |
|                                                  | Iron_acquisition_in_Streptococcus                                            | 115±12   | 146±14   |
|                                                  | Iron_Scavenging_cluster_in_Thermus                                           | 108±33   | 173±43   |
|                                                  | Bacillibactin_Siderophore                                                    | 10±1     | 18±2     |
|                                                  | Siderophore_assembly_kit                                                     | 221±16   | 324±36   |
|                                                  |                                                                              | 411±37   | 273±24   |
|                                                  |                                                                              |          |          |
| Membrane transport                               | ATP-dependent efflux pump transporter Ybh                                    |          |          |
|                                                  | Periplasmic-Binding-Protein-Dependent Transport System for &#945;-Glucosides | 251±14   | 311±28   |
|                                                  | Citrate Utilization System (CitAB,CitH,and tctABC)                           | 7±1      | 14±1     |
|                                                  | Vir-like type 4 secretion system                                             | 239±30   | 316±24   |
|                                                  | Predicted_secretion_system_X                                                 | 130±19   | 172±21   |

|                                                    |                                                                    |          |          |
|----------------------------------------------------|--------------------------------------------------------------------|----------|----------|
| Metabolism of aromatic compounds                   |                                                                    | 46±7     | 31±5     |
|                                                    | Anaerobic_toluene_and_ethylbenzene_degradation                     |          |          |
|                                                    | Homogenisate pathway of aromatic compound degradation              | 1181±75  | 1347±97  |
|                                                    | Phenylacetyl-CoA catabolic pathway (core)                          | 1653±2   | 1901±12  |
| Miscellaneous                                      | YaaA                                                               | 54±9     | 80±8     |
|                                                    | At5g38900                                                          | 278±8    | 330±8    |
|                                                    | COG0398                                                            | 493±17   | 441±11   |
|                                                    | COG2078                                                            | 59±10    | 32±7     |
|                                                    | COG3146_experimental                                               | 1362±36  | 1475±47  |
|                                                    | COG3380_COG2907                                                    | 612±31   | 697±45   |
| Nitrogen metabolism                                |                                                                    | 1674±120 | 1378±79  |
|                                                    | Denitrification                                                    |          |          |
| Nucleosides and nucleotides                        |                                                                    | 3258±70  | 3336±51  |
|                                                    | Ribonucleotide_reduction                                           |          |          |
|                                                    | De_Novo_Pyrimidine_Synthesis                                       | 3421±97  | 3208±45  |
| Phages, prophages, transposable elements, plasmids |                                                                    | 3±1      | 9±2      |
|                                                    | Phage_Dual_Exonuclease_Exclusion                                   |          |          |
|                                                    | Phage_entry_and_exit                                               | 101±21   | 150±20   |
|                                                    | Phage_introns                                                      | 5±1      | 12±3     |
|                                                    | Phage_nin_genes_-_N-independent_survival                           | 2±2      | 16±11    |
|                                                    | Phage_packaging_machinery                                          | 228±26   | 330±76   |
|                                                    | Phage_replication                                                  | 668±30   | 767±62   |
|                                                    | Prophage lysogenic conversion modules                              | 20±7     | 34±6     |
|                                                    | r1t-like_streptococcal_phages                                      | 1236±99  | 1628±260 |
|                                                    | Plasmid-encoded_T-DNA_transfer                                     | 310±21   | 373±32   |
| Protein metabolism                                 | Ribosome_LSU_eukaryotic_and_archaeal                               | 35±7     | 60±12    |
|                                                    | Translation_elongation_factor_G_family                             | 1802±31  | 1689±9   |
|                                                    | Proteasome_eukaryotic                                              | 33±11    | 70±14    |
|                                                    | Proteolysis_in_bacteria,_ATP-dependent                             | 4197±110 | 3956±45  |
|                                                    | GroEL_GroES                                                        | 1660±86  | 1510±34  |
|                                                    | Thermosome,_archaeal                                               | 14±4     | 5±1      |
|                                                    | Inteins                                                            | 195±10   | 160±9    |
|                                                    | Selenocysteine_metabolism                                          | 444±15   | 382±21   |
|                                                    | Selenoprotein_O                                                    | 321±5    | 369±9    |
| Regulation and cell signaling                      |                                                                    | 40±3     | 63±6     |
|                                                    | Cell envelope-associated LytR-CpsA-Psr transcriptional attenuators |          |          |
|                                                    | Regulatory Intramembrane Proteolysis Pathways                      | 9±1      | 16±3     |
|                                                    | Biofilm_Adhesin_Biosynthesis                                       | 33±13    | 17±1     |
|                                                    | Quorum_sensing_in_Yersinia                                         | 10±3     | 17±2     |
| Respiration                                        | CO_Dehydrogenase                                                   | 1436±55  | 1219±89  |
|                                                    | H2:CoM-S-S-HTP_oxidoreductase                                      | 22±5     | 10±2     |
|                                                    | Hydrogenases                                                       | 1131±44  | 859±51   |
|                                                    | NiFe_hydrogenase_maturation                                        | 321±17   | 260±17   |
|                                                    | Carbon_monoxide_induced_hydrogenase                                | 15±4     | 5±1      |
|                                                    | Formate_hydrogenase                                                | 4716±140 | 4190±122 |
|                                                    | Mebrane_bound_hydrogenases                                         | 13±2     | 7±2      |
| RNA metabolism                                     | Group_II_intron-associated_genes                                   | 542±179  | 370±55   |
|                                                    | Eukaryotic rRNA modification and related functions                 | 90±11    | 116±9    |
|                                                    | Spliceosome                                                        | 9±1      | 24±8     |
|                                                    | RNA_polymerase_archaeal                                            | 30±6     | 16±3     |
|                                                    | RNA_polymerase_I                                                   | 4±1      | 13±3     |
|                                                    | RNA_polymerase_II_initiation_factors                               | 7±1      | 17±3     |
|                                                    | RNA_polymerase_III                                                 | 4±2      | 20±5     |
| Stress response                                    | Synthesis_of_osmoregulated_periplasmic_glucans                     | 3725±64  | 3340±53  |
| Sulfur metabolism                                  | Sulfate_reduction-associated_complexes                             | 39±2     | 15±3     |
| Virulence, disease and defense                     |                                                                    | 8±2      | 18±1     |
|                                                    | Marinocine, a broad-spectrum antibacterial protein                 |          |          |
|                                                    | Beta-lactamase                                                     | 2156±60  | 2317±48  |

Grey color means increase and while color means decrease in abundance of functional category.

**Table S6. RPKG normalized number of reads mapped to enzymes known for chitin conversion or degradation, classified in glycosyl hydrolase (GH) families.**

| Enzyme category                    | Glycosyl hydrolase family                | Peat              | Peat+Chitin      | p-value          |
|------------------------------------|------------------------------------------|-------------------|------------------|------------------|
| Chitinases                         | GH18                                     | 0.99±0.11         | 1.24±0.25        | 0.11             |
|                                    | <b>GH19</b>                              | <b>0.44±0.05</b>  | <b>0.84±0.11</b> | <b>0.0006</b>    |
|                                    | Total chitinases                         | 1.43±0.29         | 2.09±0.25        |                  |
| N-acetyl-glucosaminidases          | GH20                                     | 1.44±0.16         | 1.51±0.17        | 0.60             |
| Chitin deacetylase                 | CE4                                      | 26.1±0.52         | 25.5±0.56        | 0.15             |
| Chitin deacetylase/<br>chitosanase | GH5                                      | 1.52±0.24         | 1.60±0.14        | 0.61             |
|                                    | GH7                                      | 0.00±0.00         | 0.00±0.00        | 1                |
|                                    | GH8                                      | 0.33±0.03         | 0.42±0.11        | 0.18             |
|                                    | Total chitosanase/<br>Chitin deacetylase | 1.86±0.23         | 2.01±0.22        |                  |
| chitosanase                        | <b>GH46</b>                              | <b>1.00±0.21</b>  | <b>2.12±0.32</b> | <b>&lt;2E-16</b> |
|                                    | <b>GH75</b>                              | <b>0.027±0.02</b> | <b>0.047±0.3</b> | <b>0.04</b>      |
|                                    | GH80                                     | 0.32±0.14         | 0.32±0.12        | 0.08             |
|                                    | Total chitosanase                        | 1.45±0.05         | 2.43±0.36        |                  |

*Values are mean ± standard deviations (n=4). Bold are Glycosyl hydrolase family statistically significant different*
